# Supplementary material for: Network pharmacology-based study of the mechanisms of action of anti-diabetic triterpenoids from Cyclocarya paliurus
Source: PubMed Central journal article supplement — RSC Adv. 2020 Oct 7;10(61):37168–81. doi: 10.1039/d0ra06846b (PMC9057148; doi:10.1039/d0ra06846b), 2020-10-07
Supplement: RA-010-D0RA06846B-s001.pdf [file RA-010-D0RA06846B-s001.pdf]

## Supplementary Table

Supplementary Table 2 The ADME data of compounds

| Compound                                                            | Molecular formula                              | Freely Rotating Bonds | H bond acceptors | H bond donors | logP         | Molecular Weight |
|---------------------------------------------------------------------|------------------------------------------------|-----------------------|------------------|---------------|--------------|------------------|
| 2 $\alpha$ ,3 $\alpha$ ,23-trihydroxyurs-12-en-28-oic acid          | C <sub>30</sub> H <sub>48</sub> O <sub>5</sub> | 5                     | 5                | 4             | 5.748±0.425  | 488.7            |
| 3 $\beta$ ,23-dihydroxy-12-ene-28-ursolic acid                      | C <sub>30</sub> H <sub>46</sub> O <sub>3</sub> | 1                     | 3                | 1             | 7.633±0.573  | 454.68           |
| 2 $\alpha$ -hydroxyursolic acid                                     | C <sub>30</sub> H <sub>48</sub> O <sub>4</sub> | 3                     | 4                | 3             | 7.113±0.412  | 472.7            |
| 2 $\alpha$ ,3 $\alpha$ ,23-trihydroxyurs-12,20(30)-dien-28-oic acid | C <sub>30</sub> H <sub>46</sub> O <sub>5</sub> | 5                     | 5                | 4             | 4.787±0.436  | 486.68           |
| 2 $\alpha$ ,3 $\beta$ ,23-trihydroxy-12-ene-28-ursolic acid         | C <sub>30</sub> H <sub>48</sub> O <sub>5</sub> | 5                     | 5                | 4             | 5.748±0.425  | 488.7            |
| 3 $\beta$ -O-trans-caffeoyl-morolic acid                            | C <sub>39</sub> H <sub>54</sub> O <sub>6</sub> | 7                     | 6                | 3             | 11.175±0.463 | 618.84           |
| actinidic acid                                                      | C <sub>30</sub> H <sub>46</sub> O <sub>5</sub> | 5                     | 5                | 4             | 4.787±0.436  | 486.68           |
| arjunolic acid                                                      | C <sub>30</sub> H <sub>48</sub> O <sub>5</sub> | 5                     | 5                | 4             | 5.593±0.442  | 488.7            |
| corosolic acid                                                      | C <sub>30</sub> H <sub>48</sub> O <sub>4</sub> | 3                     | 4                | 3             | 7.113±0.412  | 472.7            |
| Cyclocaric acid B                                                   | C <sub>30</sub> H <sub>46</sub> O <sub>5</sub> | 4                     | 5                | 3             | 5.010±0.495  | 486.68           |
| daucosterol                                                         | C <sub>35</sub> H <sub>60</sub> O <sub>6</sub> | 13                    | 6                | 4             | 8.615±0.345  | 576.85           |
| Hederagenin                                                         | C <sub>30</sub> H <sub>48</sub> O <sub>4</sub> | 4                     | 4                | 3             | 7.065±0.404  | 472.7            |
| maslinic acid                                                       | C <sub>30</sub> H <sub>48</sub> O <sub>4</sub> | 3                     | 4                | 3             | 6.958±0.430  | 472.7            |
| olean-12-en-28-oic acid                                             | C <sub>30</sub> H <sub>48</sub> O <sub>3</sub> | 1                     | 2                | 1             | 10.457±0.388 | 440.7            |
| oleanolic acid                                                      | C <sub>30</sub> H <sub>48</sub> O <sub>3</sub> | 2                     | 3                | 2             | 8.576±0.394  | 456.7            |
| taraxerol                                                           | C <sub>30</sub> H <sub>50</sub> O              | 1                     | 1                | 1             | 10.481±0.383 | 426.72           |
| $\beta$ -amyrin                                                     | C <sub>30</sub> H <sub>50</sub> O              | 1                     | 1                | 1             | 10.481±0.383 | 426.72           |
| $\beta$ -amyrone                                                    | C <sub>30</sub> H <sub>48</sub> O              | 0                     | 1                | 0             | 10.019±      | 424.7            |

|                                                                            |                      |    |    |   |                  |        |
|----------------------------------------------------------------------------|----------------------|----|----|---|------------------|--------|
|                                                                            |                      |    |    |   | 0.433            |        |
| $\beta$ -sitosterol                                                        | $C_{29}H_{50}O$      | 7  | 1  | 1 | 10.482±<br>0.287 | 414.71 |
| cyclocariosides I                                                          | $C_{35}H_{56}O_8$    | 14 | 8  | 5 | 6.018±0<br>.629  | 604.81 |
| cyclocarioside N                                                           | $C_{44}H_{74}O_{13}$ | 14 | 13 | 6 | 5.294±0<br>.807  | 811.05 |
| 3 $\beta$ , 23-dihydroxy-1,12-dioxo-<br>olean-28-oic acid                  | $C_{30}H_{46}O_6$    | 4  | 6  | 3 | 2.287±0<br>.507  | 502.68 |
| 3 $\beta$ ,23,27-trihydroxy-1-oxo-olean-<br>12-ene-28-oic acid             | $C_{30}H_{46}O_6$    | 6  | 6  | 4 | 1.993±0<br>.475  | 502.68 |
| 2 $\alpha$ ,3 $\beta$ ,23-trihydroxyurs-11-oxo-<br>12-ene-28-oic acid      | $C_{30}H_{46}O_6$    | 5  | 6  | 4 | 3.484±0<br>.439  | 502.68 |
| Cyclocarioside II                                                          | $C_{35}H_{56}O_8$    | 15 | 8  | 5 | 6.158±0<br>.642  | 604.81 |
| arjunglucoside II                                                          | $C_{36}H_{58}O_{10}$ | 12 | 10 | 7 | 4.165±0<br>.631  | 650.84 |
| quadranoside IV                                                            | $C_{36}H_{58}O_{10}$ | 12 | 10 | 7 | 4.320±0<br>.619  | 650.84 |
| $\alpha$ -boswellic acid                                                   | $C_{30}H_{48}O_3$    | 2  | 3  | 2 | 8.949±0<br>.406  | 456.7  |
| 3 $\alpha$ ,4 $\beta$ ,18 $\alpha$ -3-Hydroxyurs-12-en-<br>23-oic acid     | $C_{30}H_{48}O_3$    | 2  | 3  | 2 | 9.105±0<br>.387  | 456.7  |
| $\beta$ -boswellic acid                                                    | $C_{30}H_{48}O_3$    | 2  | 3  | 2 | 9.105±0<br>.387  | 456.7  |
| Cyclocarioside H                                                           | $C_{43}H_{72}O_{13}$ | 15 | 13 | 6 | 4.929±0<br>.845  | 797.02 |
| cyclocarioside J                                                           | $C_{35}H_{58}O_9$    | 16 | 9  | 6 | 4.624±0<br>.633  | 622.83 |
| 2 $\alpha$ ,3 $\beta$ ,23- trihydroxyoleana-<br>11,13(18)-dien-28-oic acid | $C_{30}H_{46}O_5$    | 5  | 5  | 4 | 4.618±0<br>.507  | 486.68 |
| Cyclocaric acid A                                                          | $C_{30}H_{46}O_3$    | 1  | 3  | 1 | 8.257±0<br>.416  | 454.68 |
| (+)-Betulinic acid                                                         | $C_{30}H_{48}O_3$    | 3  | 3  | 2 | 7.653±0<br>.421  | 456.7  |
| cyclocarioside K                                                           | $C_{41}H_{70}O_{12}$ | 13 | 12 | 7 | 3.914±0<br>.804  | 754.99 |
| Cyclocarioside III                                                         | $C_{36}H_{60}O_9$    | 12 | 9  | 5 | 5.062±0<br>.650  | 636.86 |
| cyclocarioside L                                                           | $C_{38}H_{62}O_{12}$ | 12 | 12 | 6 | 3.867±0<br>.707  | 710.89 |
| cyclocarioside M                                                           | $C_{40}H_{64}O_{13}$ | 13 | 13 | 5 | 4.287±0<br>.848  | 752.93 |

Supplementary Table 3 The result data of component-target-pathway network

| Name | Betweenness Centrality | Closeness Centrality | Degree layout | Neighborhood Connectivity | Topological Coefficient |
|------|------------------------|----------------------|---------------|---------------------------|-------------------------|
| M39  | 0.00                   | 0.33                 | 2.00          | 18.00                     | 0.69                    |
| M38  | 0.01                   | 0.46                 | 18.00         | 20.17                     | 0.28                    |
| M37  | 0.01                   | 0.46                 | 18.00         | 20.17                     | 0.28                    |
| M36  | 0.03                   | 0.51                 | 27.00         | 18.19                     | 0.23                    |
| M35  | 0.01                   | 0.38                 | 6.00          | 23.17                     | 0.56                    |
| M34  | 0.03                   | 0.48                 | 20.00         | 20.10                     | 0.27                    |
| M33  | 0.01                   | 0.41                 | 9.00          | 17.89                     | 0.33                    |
| M32  | 0.00                   | 0.41                 | 12.00         | 17.17                     | 0.31                    |
| M31  | 0.00                   | 0.41                 | 12.00         | 17.17                     | 0.31                    |
| M30  | 0.02                   | 0.45                 | 17.00         | 16.88                     | 0.25                    |
| M29  | 0.02                   | 0.45                 | 17.00         | 16.88                     | 0.25                    |
| M28  | 0.03                   | 0.46                 | 18.00         | 16.11                     | 0.24                    |
| M27  | 0.04                   | 0.51                 | 28.00         | 16.71                     | 0.21                    |
| M26  | 0.04                   | 0.51                 | 28.00         | 18.00                     | 0.22                    |
| M25  | 0.01                   | 0.45                 | 19.00         | 20.68                     | 0.30                    |
| M24  | 0.03                   | 0.46                 | 16.00         | 21.56                     | 0.33                    |
| M23  | 0.02                   | 0.39                 | 8.00          | 11.13                     | 0.24                    |
| M22  | 0.02                   | 0.39                 | 8.00          | 11.13                     | 0.24                    |
| M21  | 0.02                   | 0.44                 | 19.00         | 15.05                     | 0.23                    |
| M20  | 0.08                   | 0.58                 | 38.00         | 16.74                     | 0.18                    |
| M19  | 0.01                   | 0.41                 | 9.00          | 13.67                     | 0.25                    |
| M18  | 0.01                   | 0.41                 | 7.00          | 22.00                     | 0.41                    |
| M17  | 0.01                   | 0.43                 | 10.00         | 20.10                     | 0.34                    |
| M16  | 0.01                   | 0.43                 | 11.00         | 19.45                     | 0.31                    |
| M15  | 0.01                   | 0.45                 | 15.00         | 24.00                     | 0.37                    |
| M14  | 0.01                   | 0.45                 | 15.00         | 24.00                     | 0.37                    |
| M13  | 0.01                   | 0.45                 | 15.00         | 24.00                     | 0.37                    |
| M12  | 0.01                   | 0.45                 | 15.00         | 24.00                     | 0.37                    |
| M11  | 0.03                   | 0.49                 | 26.00         | 18.73                     | 0.25                    |
| M10  | 0.01                   | 0.45                 | 15.00         | 24.00                     | 0.37                    |
| M9   | 0.00                   | 0.41                 | 8.00          | 24.75                     | 0.46                    |
| M8   | 0.00                   | 0.38                 | 6.00          | 25.17                     | 0.61                    |
| M7   | 0.00                   | 0.38                 | 6.00          | 25.17                     | 0.61                    |
| M6   | 0.05                   | 0.48                 | 26.00         | 16.96                     | 0.23                    |
| M5   | 0.01                   | 0.45                 | 15.00         | 24.00                     | 0.37                    |
| M4   | 0.01                   | 0.45                 | 15.00         | 24.00                     | 0.37                    |

|          |      |      |       |       |      |
|----------|------|------|-------|-------|------|
| M3       | 0.00 | 0.39 | 5.00  | 20.60 | 0.49 |
| M2       | 0.01 | 0.45 | 15.00 | 24.00 | 0.37 |
| M1       | 0.01 | 0.45 | 15.00 | 24.00 | 0.37 |
| VEGFA    | 0.00 | 0.45 | 12.00 | 18.50 | 0.26 |
| VDR      | 0.01 | 0.43 | 10.00 | 17.20 | 0.27 |
| STAT3    | 0.01 | 0.52 | 23.00 | 22.00 | 0.24 |
| SHBG     | 0.00 | 0.35 | 6.00  | 10.00 | 0.36 |
| SCD      | 0.00 | 0.37 | 3.00  | 14.00 | 0.45 |
| PTPRF    | 0.00 | 0.42 | 16.00 | 14.63 | 0.29 |
| PTPN1    | 0.04 | 0.54 | 29.00 | 15.79 | 0.18 |
| PTGS2    | 0.00 | 0.43 | 8.00  | 17.38 | 0.28 |
| PPARG    | 0.00 | 0.43 | 7.00  | 18.14 | 0.29 |
| PPARD    | 0.00 | 0.42 | 6.00  | 20.00 | 0.34 |
| PPARA    | 0.00 | 0.42 | 8.00  | 17.75 | 0.31 |
| PIK3CA   | 0.03 | 0.53 | 27.00 | 17.44 | 0.19 |
| NR3C1    | 0.00 | 0.33 | 3.00  | 10.67 | 0.51 |
| NR1H4    | 0.00 | 0.30 | 3.00  | 7.33  | 0.58 |
| NOS2     | 0.01 | 0.47 | 20.00 | 18.25 | 0.26 |
| MAPK14   | 0.01 | 0.44 | 18.00 | 15.83 | 0.24 |
| KDR      | 0.00 | 0.40 | 6.00  | 16.83 | 0.32 |
| IL2      | 0.00 | 0.43 | 8.00  | 24.38 | 0.36 |
| IKBKB    | 0.02 | 0.48 | 23.00 | 17.35 | 0.23 |
| HSD11B2  | 0.00 | 0.35 | 2.00  | 28.00 | 0.87 |
| HSD11B1  | 0.04 | 0.49 | 23.00 | 14.57 | 0.23 |
| HMGCR    | 0.00 | 0.40 | 6.00  | 15.00 | 0.28 |
| FGF2     | 0.00 | 0.40 | 8.00  | 17.63 | 0.31 |
| FABP4    | 0.00 | 0.36 | 5.00  | 14.20 | 0.53 |
| FABP2    | 0.00 | 0.31 | 3.00  | 9.00  | 0.53 |
| F2       | 0.00 | 0.39 | 4.00  | 30.00 | 0.67 |
| ESR1     | 0.00 | 0.38 | 6.00  | 14.50 | 0.34 |
| CYP19A1  | 0.00 | 0.35 | 7.00  | 9.86  | 0.35 |
| CNR1     | 0.00 | 0.35 | 2.00  | 16.00 | 0.55 |
| CASP3    | 0.01 | 0.48 | 12.00 | 19.00 | 0.22 |
| AR       | 0.00 | 0.41 | 6.00  | 14.33 | 0.26 |
| AKR1B1   | 0.00 | 0.33 | 1.00  | 26.00 | 0.00 |
| ACPI     | 0.01 | 0.41 | 15.00 | 14.13 | 0.33 |
| hsa05133 | 0.01 | 0.44 | 16.00 | 17.38 | 0.28 |
| hsa05152 | 0.06 | 0.50 | 26.00 | 16.69 | 0.21 |
| hsa05140 | 0.01 | 0.40 | 15.00 | 15.73 | 0.32 |
| hsa04920 | 0.01 | 0.44 | 15.00 | 22.27 | 0.34 |

|          |      |      |       |       |      |
|----------|------|------|-------|-------|------|
| hsa05206 | 0.01 | 0.44 | 17.00 | 20.59 | 0.33 |
| hsa05120 | 0.00 | 0.39 | 6.00  | 22.67 | 0.48 |
| hsa04210 | 0.00 | 0.38 | 5.00  | 25.20 | 0.59 |
| hsa04932 | 0.00 | 0.40 | 9.00  | 20.67 | 0.40 |
| hsa05161 | 0.00 | 0.42 | 13.00 | 24.08 | 0.43 |
| hsa04923 | 0.01 | 0.40 | 8.00  | 18.75 | 0.35 |
| hsa04550 | 0.01 | 0.43 | 15.00 | 21.40 | 0.36 |
| hsa04910 | 0.05 | 0.54 | 31.00 | 16.71 | 0.19 |
| hsa04068 | 0.00 | 0.43 | 14.00 | 24.14 | 0.40 |
| hsa04380 | 0.01 | 0.41 | 10.00 | 21.00 | 0.38 |
| hsa04152 | 0.02 | 0.44 | 13.00 | 16.15 | 0.25 |
| hsa04014 | 0.00 | 0.41 | 12.00 | 20.42 | 0.39 |
| hsa04151 | 0.01 | 0.42 | 14.00 | 20.07 | 0.36 |
| hsa05169 | 0.00 | 0.43 | 14.00 | 24.14 | 0.40 |
| hsa04660 | 0.00 | 0.41 | 11.00 | 24.36 | 0.44 |
| hsa04066 | 0.02 | 0.48 | 25.00 | 19.16 | 0.26 |
| hsa05222 | 0.01 | 0.44 | 17.00 | 18.41 | 0.29 |
| hsa04917 | 0.01 | 0.44 | 16.00 | 20.31 | 0.32 |
| hsa05212 | 0.00 | 0.42 | 15.00 | 22.47 | 0.38 |
| hsa05160 | 0.01 | 0.45 | 18.00 | 22.11 | 0.32 |
| hsa04015 | 0.01 | 0.41 | 13.00 | 18.08 | 0.34 |
| hsa05221 | 0.01 | 0.44 | 16.00 | 22.44 | 0.35 |
| hsa05145 | 0.02 | 0.49 | 26.00 | 19.77 | 0.25 |
| hsa04668 | 0.00 | 0.40 | 9.00  | 21.22 | 0.42 |
| hsa05142 | 0.02 | 0.48 | 23.00 | 19.96 | 0.27 |
| hsa04370 | 0.01 | 0.41 | 12.00 | 18.92 | 0.34 |
| hsa04931 | 0.08 | 0.57 | 37.00 | 17.30 | 0.18 |
| hsa05205 | 0.02 | 0.45 | 22.00 | 17.59 | 0.27 |
| hsa03320 | 0.01 | 0.34 | 11.00 | 9.09  | 0.32 |
| hsa05200 | 0.12 | 0.58 | 41.00 | 16.39 | 0.18 |

---

## Supplementary Figure

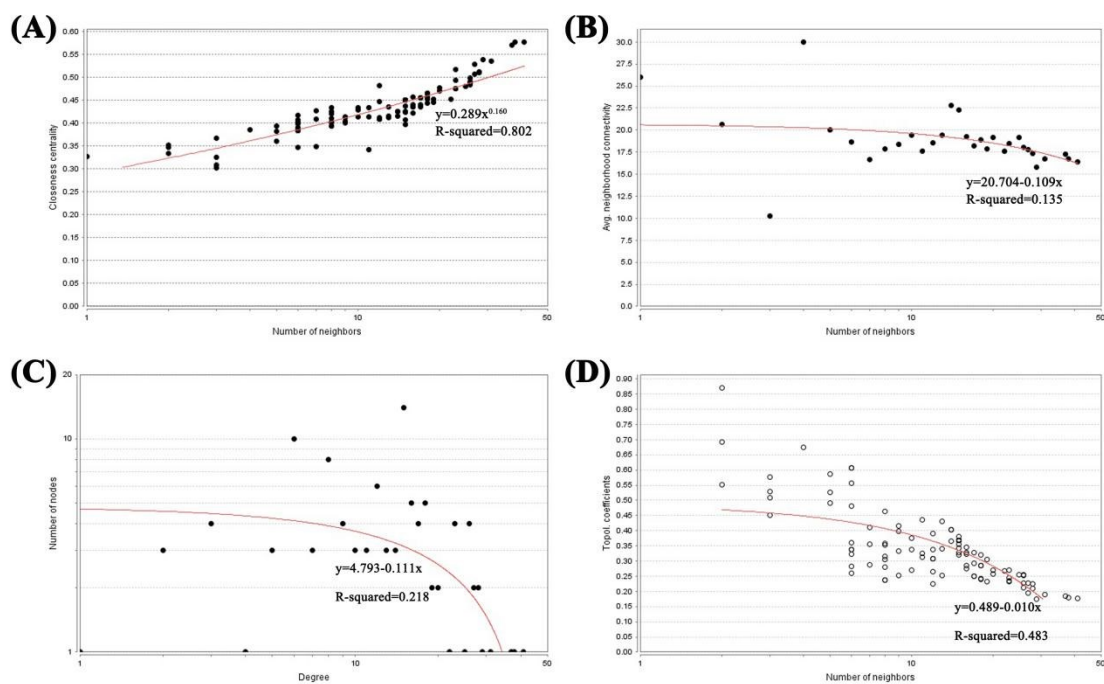

Supplementary Figure 1 The figures of network analysis graph

- (A) Closeness centralities
- (B) Neighborhood connectivity distribution
- (C) Node degree distribution
- (D) Topological coefficient

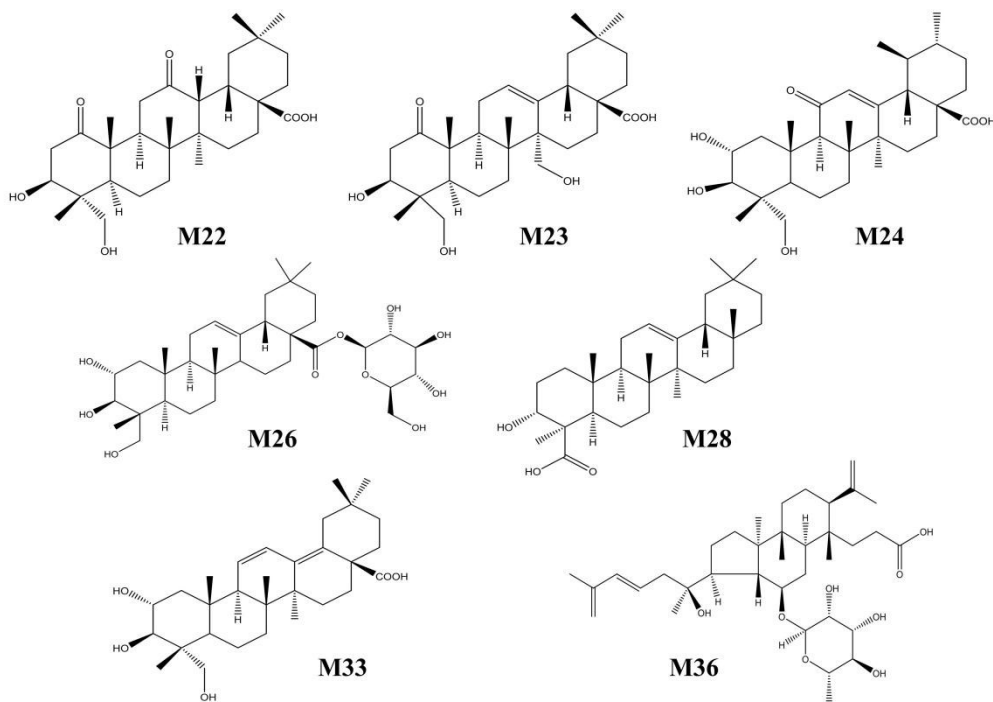

Supplementary Figure 2 The structure of the seven potential active compounds from *Cyclocarya paliurus*. M22: 3 $\beta$ , 23-dihydroxy-1,12- dioxo-olean-28-oic acid; M23: 3 $\beta$ ,23,27- trihydroxy-1-oxo-olean-12-ene-28-oic acid; M24: 2 $\alpha$ ,3 $\beta$ ,23-trihydroxyurs-11-oxo-12-ene- 28-oic acid; M26: arjunglucoside II; M28:  $\alpha$ -boswellic acid; M33:2 $\alpha$ ,3 $\beta$ ,23- trihydroxyoleana-11,13(18)-dien-28-oic acid; M36: cyclocarioside K.
